# Supplementary material for: Defining Self-Management for Solid Organ Transplantation Recipients: A Mixed Method Study
Source: MDPI journal article supplement (doi:10.3390/nursrep14020073), 2024-04-17
Supplement: s1 [file s1]

Supplementary File S3 (S3): Secondary source characteristics

| Focus of study/publication                                                                                                  | SM definition/<br>Descriptive<br>summary of<br>application of<br>SM<br>intervention /<br>other concept/<br>none | Source                                                                           | Population                                                                               | Context/setting of study<br>or publication                                            | Concepts examined                                                                        | Publication<br>: type                     | Study design<br>methods, sample<br>&        |
|-----------------------------------------------------------------------------------------------------------------------------|-----------------------------------------------------------------------------------------------------------------|----------------------------------------------------------------------------------|------------------------------------------------------------------------------------------|---------------------------------------------------------------------------------------|------------------------------------------------------------------------------------------|-------------------------------------------|---------------------------------------------|
| The aim of the study was to evaluate the self-care agency and determine the affecting factors in renal transplant patients. | Definition of self-care                                                                                         | [69]<br>Translat<br>ion not<br>availabl<br>e<br>[103] FT<br>not<br>availabl<br>e | Kidney SOTx                                                                              | [69] Turkish<br><br>Patients who had renal<br>transplant in a<br>university hospital. | [69] self-care agency<br>(component of<br>Orem’s Self Care<br>Deficit Nursing<br>Theory) | Journal<br>article,<br>(quantitativ<br>e) | Descriptive cross-<br>sectional study (N50) |
| Unknown                                                                                                                     | Unknown                                                                                                         | [103]–<br>FT not<br>availabl<br>e                                                | Unknown                                                                                  | Unknown                                                                               | Unknown                                                                                  | Unknown                                   | Unknown                                     |
| To examine how self-management has been operationalized in the presence of multiple chronic conditions                      | Definition                                                                                                      | [74]<br>Citing<br>[23,79,8<br>6]                                                 | Adults with at least<br>two or more chronic<br>illnesses (including<br>mental illnesses) | (Narrative review)<br><br>Countries NR                                                | SM                                                                                       | Journal<br>article,                       | Narrative review                            |

|                                                                                                                                                                                                                                                                                                                                             |                                              |                                                      |                                  |                                                                       |                                                                                                                               |                 |                                                                                       |
|---------------------------------------------------------------------------------------------------------------------------------------------------------------------------------------------------------------------------------------------------------------------------------------------------------------------------------------------|----------------------------------------------|------------------------------------------------------|----------------------------------|-----------------------------------------------------------------------|-------------------------------------------------------------------------------------------------------------------------------|-----------------|---------------------------------------------------------------------------------------|
|                                                                                                                                                                                                                                                                                                                                             |                                              |                                                      |                                  | Assessment of service delivery and telehealth interventions           |                                                                                                                               |                 |                                                                                       |
| To synthesize current research findings related to self-management, in order to better understand the processes of priority setting and decision-making among adults with multi-morbidity                                                                                                                                                   | Definition                                   | [23]                                                 | Adults with multi-morbidity      | A narrative review<br>Studies from Europe, 8 from USA                 | SM                                                                                                                            | Journal article | Narrative review                                                                      |
|                                                                                                                                                                                                                                                                                                                                             |                                              |                                                      |                                  | Patient experience studies in primary care or home/community settings |                                                                                                                               |                 |                                                                                       |
| To develop a better understanding of how people with multiple chronic illnesses prioritize their various conditions<br>The overriding aim of this nine-month trial was to test whether facilitated access to an Internet health portal could improve the capacity of men and women with heart disease to manage their own heart conditions. | Definition                                   | [79]<br>Citing<br>[58–<br>60,62,68<br>,72,76,7<br>8] | Patients with heart disease      | home/community settings                                               | Study examines the concepts of “chronic illness trajectory” and “biographical disruption” to examine how patients self-manage | Journal article | qualitative mixed methods-<br>Questionnaires, focus groups, and Internet forums (N53) |
| To explain the model of chronic illness management based upon the trajectory framework and implications for nursing                                                                                                                                                                                                                         | Definition of management of chronic illness: | [62]                                                 | Patients with chronic conditions | (Non-empirical) Theory intended for nursing practice                  | Theoretical concerns of the sociology of work are addressed as                                                                | Journal article | theoretical paper                                                                     |

|                                                                                                                                                                                                                                         |                                                                                                  |                     |                                                         |                                                                                                                                                                                                                     |                                                                                                                                                                                                                  |                 |                                               |
|-----------------------------------------------------------------------------------------------------------------------------------------------------------------------------------------------------------------------------------------|--------------------------------------------------------------------------------------------------|---------------------|---------------------------------------------------------|---------------------------------------------------------------------------------------------------------------------------------------------------------------------------------------------------------------------|------------------------------------------------------------------------------------------------------------------------------------------------------------------------------------------------------------------|-----------------|-----------------------------------------------|
| (non-empirical)                                                                                                                                                                                                                         |                                                                                                  |                     |                                                         |                                                                                                                                                                                                                     | <p>well as the substantive issues of managing chronic illness. Model of chronic illness management based upon the trajectory framework. Including trajectory management, biography, everyday life activities</p> |                 |                                               |
| To explore a limited range of theoretical and empirical issues <i>thrown up</i> by the study of chronic illness                                                                                                                         | None                                                                                             | [58]                | Rheumatoid arthritis patients                           | England<br><br>Outpatient clinic                                                                                                                                                                                    | Chronic illness as a disruptive event                                                                                                                                                                            | Journal article | qualitative study and theoretical paper (N30) |
| To illuminate the nature and the processes of utilisation which accompany self-management skills-training by exploring the way in which patients related to services prior and subsequent to participation in a self-care intervention. | Self-management support definition<br><br>SM and self-care education with a self-care definition | [68]<br>Citing [64] | Patients recruited across a range of chronic conditions | England<br><br>Qualitative study of health service use in context of RCT-intervention was EPP is a group-based intervention delivered in community. The programme is based on self-efficacy theory (Bandura, 1977)- | self-management education-including biographical and social context                                                                                                                                              | Journal article | longitudinal qualitative study (N23)          |

|                                                                                                                                                                     |                              |                         |                                                                 |                                                                                                                 |                                          |                 |                                                                                                     |
|---------------------------------------------------------------------------------------------------------------------------------------------------------------------|------------------------------|-------------------------|-----------------------------------------------------------------|-----------------------------------------------------------------------------------------------------------------|------------------------------------------|-----------------|-----------------------------------------------------------------------------------------------------|
|                                                                                                                                                                     |                              |                         |                                                                 | aims to improve self-efficacy                                                                                   |                                          |                 |                                                                                                     |
| Self-care support                                                                                                                                                   | Self care support definition | [64]                    | People with long-term conditions                                | England, UK<br><br>NHS services and at home                                                                     | Self-care                                | Policy document | N/A                                                                                                 |
| To provide an overview of care and conceptual models for patients with diabetes and comorbidities                                                                   | None                         | [60]                    | Patients with diabetes and co morbidities                       | Non empirical                                                                                                   | Complications, Self care                 | Journal article | literature and theory review                                                                        |
| To explore the barriers experienced in self-managing it. Questionnaires, focus groups, and Internet forums were analysed to explore Obstacles in self-managing CHD. | None                         | [78]                    | Elderly heart disease patients from a deprived, inner city area | Manchester, UK<br><br>sample derived from larger study primary care database<br><br>Community / at home setting | Inequalities in managing chronic illness | Journal article | qualitative study, Questionnaires ,30 focus groups, discussion forums, and Internet log data (N108) |
| To identify perceived barriers to self-care among patients with comorbid chronic diseases.                                                                          | Definition                   | [59]<br>Citing [61,104] | Patients with Comorbid Chronic Diseases                         | Colorado, USA<br><br>(Urban ) primary care practice recruitment for perspectives about at home care             | Self-care                                | Journal article | qualitative study, semi-structured interviews (N16)                                                 |
| Reviewed literature for changes to traditional care systems that would improve care and to improve and refine the Milbank article model-                            | None                         | [104]                   | Patients with chronic illness                                   | Authors asked 75 experts in chronic illness management to review the revised CCM model.                         | Milbank Chronic Care Model               | Journal article | literature review                                                                                   |

|                                                                                                                                                                       |            |                        |                                                                                                                         |                                                                                                                      |                                                                                                                                      |                  |                                                                 |
|-----------------------------------------------------------------------------------------------------------------------------------------------------------------------|------------|------------------------|-------------------------------------------------------------------------------------------------------------------------|----------------------------------------------------------------------------------------------------------------------|--------------------------------------------------------------------------------------------------------------------------------------|------------------|-----------------------------------------------------------------|
| Review of SM                                                                                                                                                          | Definition | [61]                   | Older adults with chronic disease and in general                                                                        | At home SM from studies reporting on a range of SM tasks e.g. smoking cessation, adapting to work, using medications | SM, At home management and psychosocial coping, self regulation and control, Bandura Social Cognitive Theory (1986) theory Self care | Journal article  | overview of theory and research                                 |
| To examine whether and how chronic pain affects diabetes self-management.                                                                                             | None       | [76]                   | Patients with diabetes and chronic pain                                                                                 | USA<br><br>Patients receiving care through the Department of Veterans Affairs (VA). Focus at home self-care          | SM<br>Self-care                                                                                                                      | Journal article  | Quantitative cross sectional study (N993)                       |
| Authors conducted 10 focus groups to inform development of Homing in on Health (HioH), a home delivery variant of the Chronic Disease Self-Management Program (CDSMP) | Definition | [72]<br>Citing<br>[80] | Chronic disease (Diabetes 37 (69)<br>Arthritis 31 (57)<br>Depression 24 (44)<br>CHF 21 (39)<br>Asthma 13 (24)<br>Other) | USA<br><br>Development of an intervention (community)                                                                | active self-management                                                                                                               | Journal article, | Qualitative study to inform an intervention, focus groups (N54) |
| Self-management for chronic illnesses- support guidance for SM skills for patients                                                                                    | Definition | [80]                   | Chronic conditions (Heart Disease, Arthritis, Stroke, Diabetes, Asthma,                                                 | Non-empirical USA<br><br>Patient guidance                                                                            | SM skills                                                                                                                            | Book,            | non-empirical                                                   |

|                                                                                                                                                                                                   |            |                        |                                                                                                                                  |                                                                                                                     |                                                |                  |                                                                            |
|---------------------------------------------------------------------------------------------------------------------------------------------------------------------------------------------------|------------|------------------------|----------------------------------------------------------------------------------------------------------------------------------|---------------------------------------------------------------------------------------------------------------------|------------------------------------------------|------------------|----------------------------------------------------------------------------|
|                                                                                                                                                                                                   |            |                        | Bronchitis,<br>Emphysema and<br>Others)                                                                                          |                                                                                                                     |                                                |                  |                                                                            |
| To examine what influences self-management priorities for individuals with multiple long-term conditions and how this changes over time.                                                          | Definition | [86]<br>Citing<br>[73] | Participants with more than one chronic condition: irritable bowel syndrome; chronic obstructive pulmonary disease and diabetes. | North west, UK<br><br>SM at home                                                                                    | SM<br><br>dynamic prioritization of conditions | Journal article, | qualitative study, semi-structured interviews (N21)                        |
| Authors used a corpus of data collected over the past 5 years to explore the assumptions that underpin common usage of the term self-management among policy-makers, professionals and consumers. | Definition | [73]                   | None specified-theory-based paper                                                                                                | Australian policy and international research                                                                        | SM - Self-managing self-management             | Journal article  | overview of literature (including definitions)                             |
| To identify strategies that can be used by communities to help patients manage their condition(s) while leading active and productive lives                                                       | Definition | [70]<br>[71]           | Patients with chronic conditions                                                                                                 | Non-empirical<br><br>Summit in 2004 of the IOM; Institute of Medicine, USA- Chronic illness communities contributed | SM                                             | Summit report    | discursive summary of strategies                                           |
| To establish priority areas for policy and research                                                                                                                                               | Definition | [71]                   | Community sample - Asthma and heart failure patients                                                                             | Non empirical Report was compilation of secondary evidence                                                          | SMS                                            | Report-          | summary of Committee on Identifying Priority Areas for Quality Improvement |

|                                                                                                                                                        |            |                                    |                                  |                                                                                                                                                                    |                                                                                         |                 |                                                                                                                                                  |
|--------------------------------------------------------------------------------------------------------------------------------------------------------|------------|------------------------------------|----------------------------------|--------------------------------------------------------------------------------------------------------------------------------------------------------------------|-----------------------------------------------------------------------------------------|-----------------|--------------------------------------------------------------------------------------------------------------------------------------------------|
|                                                                                                                                                        |            |                                    |                                  |                                                                                                                                                                    |                                                                                         |                 | (reference to secondary evidence)                                                                                                                |
| To present innovations in SM education in primary care                                                                                                 | Definition | [30]<br>Citing<br>[109]            | Patients with chronic conditions | Literature review<br><br>Studies contained populations from studies and RCTs on asthma, diabetes, arthritis, chronic conditions generally<br><br>USA; Primary care | self-management; collaborative Care, self-efficacy in SM; patient physician partnership | Journal article | evidence summary (RCT focus)                                                                                                                     |
| To understand the way in which people who lived with chronic illness constructed the notion of self-management.<br>Population: Patients with Arthritis | Definition | [75]<br>Citing<br>[55,56,82,84,97] | Patients with a chronic illness  | Australia, home setting                                                                                                                                            | SM and evaluation of SM Programmes                                                      | Journal article | qualitative research, autobiographical study N9                                                                                                  |
| To examine the 12-year history of the Arthritis Self-Management Studies.                                                                               | Definition | [82]<br>Citing<br>[83,100]         | Patients with arthritis and pain | Review of secondary evidence<br>And intervention results<br><br>USA<br><br>Patients report on at home pain                                                         | SM<br>Self-efficacy<br>Patient education<br>Control<br>Cost effectiveness               | journal article | quantitative evaluation of an intervention, self-administered questionnaires, 3 randomised studies of different associations)<br>N707 N107 N 224 |

|                                                                                                                                                           |      |                        |                                                                                                                                     |                                                                              |                                                                       |                  |                                                                                                                                                                                             |
|-----------------------------------------------------------------------------------------------------------------------------------------------------------|------|------------------------|-------------------------------------------------------------------------------------------------------------------------------------|------------------------------------------------------------------------------|-----------------------------------------------------------------------|------------------|---------------------------------------------------------------------------------------------------------------------------------------------------------------------------------------------|
| To develop a self-efficacy scale for people with arthritis                                                                                                | None | [83]                   | People with arthritis                                                                                                               | USA<br><br>Measures assessed within a self management course                 | Self-efficacy SM                                                      | journal article, | quantitative evaluation of a measure, N54                                                                                                                                                   |
| To facilitate a clearer understanding of both the concept and its relevance for health education research and practice                                    | None | [100]                  | Patients requiring behavioural change intervention in cigarette smoking, weight control, contraception, alcohol abuse and exercise. | Secondary evidence<br><br>Behavioural lifestyle interventions                | Self-efficacy<br>Bandura's Health education<br>Social Learning Theory | Journal article  | literature review of empirical studies (including survey, intervention and experimental design)                                                                                             |
| Determine strengths and weaknesses of the Arthritis Self-Management Program (ASMP). 2) Compare 3- and 6-week ASMP. 3) Evaluate 1.5-hour arthritis program | None | [84]<br>Citing<br>[85] | Patients with arthritis                                                                                                             | USA<br>Intervention context<br>Community setting                             | SM                                                                    | Journal article  | 3 studies- Study 1 : Qualitative methods incorporating incomplete block design. Study 2: Comparison of 3- and 6-week outcomes. Study 3: Pre-test/ post-test comparison s1N164 s2N151 s3N200 |
| To evaluate an arthritis SM programme                                                                                                                     | None | [54]                   | Arthritis patients                                                                                                                  | USA<br>Intervention RCT context Community setting, includes primary care use | SM                                                                    | Journal article  | RCT N554                                                                                                                                                                                    |
| To determine the effectiveness of a SM education intervention                                                                                             | None | [55]                   | Arthritis patients with pain                                                                                                        | USA                                                                          | SM                                                                    | Journal article  | quantitative intervention before and                                                                                                                                                        |



|                                                                                                                             |                                                                   |                        |                                                        |                                                              |                                                                                                                                                                                                                                                                                    |                    |                                                                                                           |
|-----------------------------------------------------------------------------------------------------------------------------|-------------------------------------------------------------------|------------------------|--------------------------------------------------------|--------------------------------------------------------------|------------------------------------------------------------------------------------------------------------------------------------------------------------------------------------------------------------------------------------------------------------------------------------|--------------------|-----------------------------------------------------------------------------------------------------------|
|                                                                                                                             |                                                                   |                        |                                                        | Intervention- adult<br>education community<br>setting        |                                                                                                                                                                                                                                                                                    |                    | after study,<br>questionnaire N89                                                                         |
| Extending current models of activity of living to<br>include chronic pain                                                   | Coping<br>definition                                              | [97]<br>Citing<br>[77] | Chronic pain patients                                  | Non empirical<br>Nursing theory for<br>practice (UK context) | Chronic pain and<br>coping<br>Stress                                                                                                                                                                                                                                               | Journal<br>article | theory                                                                                                    |
| Authors investigate persons with expertise in<br>self-care management of type2<br>diabetes,HIV/AIDS, and multiple sclerosis | Descriptive<br>summary of<br>application of<br>SM<br>intervention | [101]                  | Type2 diabetes,<br>HIV/AIDS, and<br>multiple sclerosis | Self-care home setting                                       | Self-care                                                                                                                                                                                                                                                                          | Journal<br>article | secondary analysis of<br>qualitative studies,<br>focus groups, Think<br>aloud, interview<br>methods (N43) |
| Address theory on self-care work and chronic<br>illness                                                                     | Definition                                                        | [109]                  | Chronically ill<br>patients                            | Theory (at home<br>setting)                                  | Theoretical<br>concerns of the<br>sociology of work<br><br>Problems of<br>managing chronic<br>illness at home<br><br><i>Three types of work<br/>and consequences of<br/>their interplay are<br/>discussed: illness<br/>work, everyday life<br/>work, and<br/>biographical work</i> | Book               | Theory (includes case<br>histories)                                                                       |

|                                                                                                                                           |            |                               |                                                                   |                                                                   |                                                                                                                                                             |                          |                                                                                               |
|-------------------------------------------------------------------------------------------------------------------------------------------|------------|-------------------------------|-------------------------------------------------------------------|-------------------------------------------------------------------|-------------------------------------------------------------------------------------------------------------------------------------------------------------|--------------------------|-----------------------------------------------------------------------------------------------|
| To test content validity and usability of the Organ Transplant Information System (OTISTM).                                               | Definition | [99]<br>Citing<br>[25,109]    | Kidney transplantation patients                                   | Switzerland Clinical setting                                      | self-management – including conceptual model, patient education                                                                                             | Journal article,         | qualitative content validity of an intervention, Think Aloud method and descriptive data N 14 |
| Short history of self-management.                                                                                                         | Definition | [25]<br>Citing<br>[57,92,109] | None specified, literature review includes chronic diseases       | Secondary analysis literature review                              | Self-Management Education:                                                                                                                                  | Journal article,         | qualitative content validity of an intervention, Think Aloud method and descriptive data N 14 |
| Philosophy of meta patterns and information                                                                                               | None       | [57]                          | No specific population                                            | Theory- non empirical                                             | Combining information meta pattern                                                                                                                          | Book,                    | theory                                                                                        |
| To present the Shifting Perspectives Model of Chronic Illness, which was derived from a metasynthesis of 292 qualitative research studies | None       | [92]                          | Chronic illness                                                   | Literature synthesis<br>Reported experience of pw chronic illness | The Shifting Perspectives Model                                                                                                                             | Journal article          | meta synthesis, 292 qualitative studies N not reported                                        |
| Overview of the literature (ethical analysis) of Patient adherence and patient self-management literature                                 | Definition | [94]<br>Citing<br>[26,95]     | SOTx patients                                                     | Overview of the literature                                        | Patient adherence and patient self-management, ethical framework                                                                                            | Journal article          | discussion; ethical analysis, literature overview                                             |
| SM of chronic disease theory development                                                                                                  | Definition | [95]<br>Citing<br>[81]        | Chapters related people with chronic disease and renal transplant | Theory and literature overview<br><br>USA                         | SM preparation , living with chronic disease and types of work (same as Corbin and Strauss , 1988). , associated learning approaches theory-social learning | journal article, review, | theory referring to literature                                                                |

|                                                                                                                                                                                         |            |                        |                                                                                                                              |                                                                                                                                   |                                                                                                            |                  |                                                                                                              |
|-----------------------------------------------------------------------------------------------------------------------------------------------------------------------------------------|------------|------------------------|------------------------------------------------------------------------------------------------------------------------------|-----------------------------------------------------------------------------------------------------------------------------------|------------------------------------------------------------------------------------------------------------|------------------|--------------------------------------------------------------------------------------------------------------|
|                                                                                                                                                                                         |            |                        |                                                                                                                              |                                                                                                                                   | theory, trans-theoretical model, belief models, problem solving                                            |                  |                                                                                                              |
| Discussion of the rationale and definition of SM and health education SM model example application                                                                                      | Definition | [81]                   | Populations with Chronic illness                                                                                             | Draws on literature of primary and secondary, nursing home contexts and at home management                                        | The SM model<br><br>SM education criteria<br><br>Acute and chronic disease differences (Holman 1992 model) | Journal article, | definitions and literature overview                                                                          |
| To review the SM approaches of people with chronic conditions                                                                                                                           | Definition | [26]<br>Citing<br>[31] | Patients with chronic conditions<br><br>Majority of studies about asthma (66/145) includes 3 general chronic disease studies | Literature review<br>Majority of countries USA (82); UK (13) ; (10) Australia from 145                                            | SM                                                                                                         | Journal article  | theoretical and methods overview, Literature review studies from: USA (82); 13 UK; 10 Australia N145 studies |
| Overview of patient education interventions for people with osteoarthritis (OA) including a review of the methods used and the typical content of current educational provision for OA. | Definition | [31]<br>Citing<br>[61] | Osteoarthritis patients                                                                                                      | Literature review of secondary evidence for interventions<br><br>Settings include primary care, at home, community, clinical care | Sm focus<br><br>Distinguish between Self-care and SM                                                       | Book (manual)    | theory                                                                                                       |

|                                                                                                                                                                                                      |                                                        |                                      |                                               |                                      |                                                      |                 |                                                                             |
|------------------------------------------------------------------------------------------------------------------------------------------------------------------------------------------------------|--------------------------------------------------------|--------------------------------------|-----------------------------------------------|--------------------------------------|------------------------------------------------------|-----------------|-----------------------------------------------------------------------------|
| Article<br>contains tips for the home health professional on how he or she can improve the health literacy of his or her patients, which can save lives.                                             | None                                                   | [93]                                 | Adults with low health literacy               | Management in home setting           | Health literacy, Medication mismanagement            | journal article | literature overview                                                         |
| To delineate five concepts that are often used synonymously in the nursing and related literature: self-care, self-management, self-monitoring, symptom management, and self-efficacy for self-care. | Definition                                             | [33]<br>Citing<br>[34,90,98,101,102] | No specific patient focus                     | USA                                  | SM                                                   | Journal article | conceptual overview                                                         |
| The objective of this study was to analyse and define the concept of self-management for adults diagnosed with epilepsy in the previous 12 months.                                                   | Descriptive summary of application of SM interventions | [102]                                | Adults newly diagnosed with epilepsy          | USA<br><br>Home setting              | SM                                                   | Journal article | qualitative research and literature review, semi structured interviews (N4) |
| Explores the development of the concept of self-care through health related literature and reviews the factors that have shaped the concept.                                                         | Definition                                             | [34]<br>Citing<br>[52,64,67,87,96]   | Chronic disease                               | Literature review                    | Self-care, chronic disease management; SM programmes | Journal article | literature review<br>concept analysis                                       |
| Guest Editorial: Chronic disease management and self-care support for people living with long-term conditions: is the nursing workforce prepared?                                                    | Definition                                             | [52]                                 | People living with long-term conditions       | Secondary source review in editorial | SM<br>Self care                                      | Journal article | Editorial                                                                   |
| Outline of policy to meet needs of people with chronic conditions                                                                                                                                    | Definition                                             | [87]                                 | people with chronic conditions and depression | Policy document New Zealand          | SM support                                           | Policy document | N/A                                                                         |

|                                                                                                                                                                                                                                                                                           |                         |                                               |                               |                                                                                                                 |                                                                    |                 |                                                                                                             |
|-------------------------------------------------------------------------------------------------------------------------------------------------------------------------------------------------------------------------------------------------------------------------------------------|-------------------------|-----------------------------------------------|-------------------------------|-----------------------------------------------------------------------------------------------------------------|--------------------------------------------------------------------|-----------------|-------------------------------------------------------------------------------------------------------------|
| To examine ethical issues facing the SM, urging ways in which these issues must be addressed as the movement continues to evolve                                                                                                                                                          | Definition              | [96]<br>Citing<br>[26]                        | Patients with chronic disease | Literature overview and ethical analysis                                                                        | SM<br>Self-Empowerment                                             | Journal article | ethical analysis-<br>literature overview                                                                    |
| The goal of the pilot study was to evaluate the preliminary effect of an MISC intervention on HF patients' self-care behaviours.                                                                                                                                                          | Definition of self-care | [90]                                          | Heart failure patients        | Pilot study for an intervention (motivational interviewing via phone) recruited via tertiary care<br><br>Canada | Self-care- The Theory of HF Self-care (Rieegel et al 2008)         | Journal article | pilot study randomised control group study<br>N30                                                           |
| To describe a situation-specific theory of heart failure self-care in which self-care is defined as a naturalistic decision-making process involving the choice of behaviours that maintain physiologic stability (maintenance) and the response to symptoms when they occur (management) | Definition              | [98]<br>Citing<br>[25,28,6<br>3,67,88,<br>91] | Heart failure patients        | Primary data obtained from 7 sites in the United States- setting unknown                                        | Self-care, SM; Self-care management (including a conceptual model) | Journal article | quantitative and qualitative instrument development, secondary data analysis for theory development<br>N760 |
| Review of literature and concepts of Self-care perspectives from six disciplines                                                                                                                                                                                                          | Definition of self-care | [67]<br>36<br>Gantz,<br>1990                  | Nursing perspective           | Non empirical<br><br>USA                                                                                        | Self-care                                                          | Journal article | Literature review                                                                                           |
| Literature overview of behavioural contributions to childhood asthma                                                                                                                                                                                                                      | None                    | [63]                                          | Children with asthma          | Literature overview                                                                                             | Rehabilitation, self-control                                       | journal article | literature overview of interventions and                                                                    |

|                                                                                                                                                                                                                                                                                                                                     |            |                                          |                                                              |                                                                                                                                                              |    |                            |                                                                                                                                                                                                                                                                                  |
|-------------------------------------------------------------------------------------------------------------------------------------------------------------------------------------------------------------------------------------------------------------------------------------------------------------------------------------|------------|------------------------------------------|--------------------------------------------------------------|--------------------------------------------------------------------------------------------------------------------------------------------------------------|----|----------------------------|----------------------------------------------------------------------------------------------------------------------------------------------------------------------------------------------------------------------------------------------------------------------------------|
|                                                                                                                                                                                                                                                                                                                                     |            |                                          |                                                              | <p>Description of Children's asthma rehabilitation programme interventions (includes setting of the Centre and interventions at home)</p> <p>Denver, USA</p> |    |                            | description of an intervention                                                                                                                                                                                                                                                   |
| This supplement to Patient reviews across the whole field of self-management of asthma by adults.                                                                                                                                                                                                                                   | Definition | [91]                                     | Adults with Asthma                                           | <p>Literature overview</p> <p>Descriptions from UK</p>                                                                                                       | SM | Journal article-supplement | literature overview                                                                                                                                                                                                                                                              |
| <p>1.Explore how patient expertise is viewed, interpreted, defined and experienced by both patients and health professionals.</p> <p>2. Analyse how patient expertise is promoted and enabled through the self-management process.</p> <p>3. Uncover the mechanisms that enhance or impede the development of patient expertise</p> | Definition | <p>[28]</p> <p>Citing [65,66,89,105]</p> | Nurses' responses to expert patients with chronic conditions | A relatively affluent English county including community, primary and secondary care settings                                                                | SM | Journal article            | <p>A grounded theory approach was utilised with two concurrent data strands. Focus groups, interviews and observation., purposeful and theoretical sampling</p> <p>N100 health professionals (nurses, doctors, physiotherapists) and N100 adults affected by chronic disease</p> |

|                                                                                                                                                                                                                                                                                                      |            |       |                                                               |                                                                                                         |                                                                                                                                           |                 |                                                                         |
|------------------------------------------------------------------------------------------------------------------------------------------------------------------------------------------------------------------------------------------------------------------------------------------------------|------------|-------|---------------------------------------------------------------|---------------------------------------------------------------------------------------------------------|-------------------------------------------------------------------------------------------------------------------------------------------|-----------------|-------------------------------------------------------------------------|
| The aim of the study was to obtain the views and priorities of people with multiple sclerosis (MS) to inform the design of a professionally guided self-care programme                                                                                                                               | None       | [88]  | People with multiple sclerosis (MS)                           | The study was conducted at the Centre for Research in Rehabilitation at Brunel University in London, UK | Self-care                                                                                                                                 | Journal article | A three-round postal Delphi survey was used as a research to study N136 |
| Review, on what is meant by the term “asthma self-management”, how self-management plans are developed and implemented, the evidence for their efficacy, what models are available, what patients seem to want, which asthmatics need to follow self-management compliance with this system of care. | Definition | [65]  | Asthma patients                                               | Literature review , international                                                                       | SM Models: Asthma self-management plan promoted by National Asthma Campaign (UK). Booklet 7: ‘Self-management and peak flow measurement’. | Journal article | literature overview                                                     |
| Reports on a pilot study on the effects of self-management in COPD suggest a reduction of morbidity due to COPD.                                                                                                                                                                                     | Definition | [105] | COPD patients                                                 | Out-patient setting Germany                                                                             | SM behaviours, educational programmes                                                                                                     | journal article | Before and after trial of a an intervention, N19                        |
| This paper aims to provide guidance for clinicians, based on the evidence available regarding the clinical effectiveness and health economics of the self management of oral anticoagulation therapy by patients                                                                                     | Definition | [66]  | Patients undertaking self-management of oral anticoagulation. | Review of literature UK perspective, international evidence                                             | SM, near patient device (CoaguChek, Roche Diagnostics, Mannheim), health technology assessment                                            | journal article | Literature overview                                                     |

|                                                                                                                                                                               |                                                       |                        |                                                        |                                                                                                 |                                                                                                                                                                                                                                                                                                                                                                                |                     |                                                                                                                                                              |
|-------------------------------------------------------------------------------------------------------------------------------------------------------------------------------|-------------------------------------------------------|------------------------|--------------------------------------------------------|-------------------------------------------------------------------------------------------------|--------------------------------------------------------------------------------------------------------------------------------------------------------------------------------------------------------------------------------------------------------------------------------------------------------------------------------------------------------------------------------|---------------------|--------------------------------------------------------------------------------------------------------------------------------------------------------------|
| Behavioural study to assess whether high generalised and asthma-specific self-efficacy expectancies were predictive of adequate self-management and self-treatment behaviour. | Descriptive summary of application of SM intervention | [89]<br>Citing<br>[53] | Patient with asthma and COPD                           | Population survey ,<br>home setting self-treatment<br><br>Netherlands                           | SM,<br>Social support, self-efficacy; social-learning theory<br>of Bandura                                                                                                                                                                                                                                                                                                     | journal<br>article, | Behavioural study<br>Questionnaire A N4563<br>persons (18–65 years)<br>who had used inhaled medication in 1993- of<br>which N1262 were<br>asthmatic patients |
| To present theory                                                                                                                                                             | Definition of self-efficacy                           | [53]                   | SM of pain relates to heart attack patients<br>example | SM example is based in<br>context of pain<br>cognitive appraisal in<br>everyday life<br><br>USA | SM – only in<br>relation n to coping<br>with pain ,<br>including<br>psychosocial<br>influencers<br>Social<br>cognitive/learning<br>theory. Theory of<br>human nature and<br>causality, (within<br>self-efficacy theory<br>concepts relate to<br>generative<br>capability,<br>competent<br>functioning , faulty<br>assessment,<br>perceived self-efficacy , health<br>behaviour | Book                | theory                                                                                                                                                       |
